# Supplementary material for: Electron transport shuttle mechanism via an Fe–N–C bond derived from a conjugated microporous polymer for a supercapacitor
Source: Royal Society of Chemistry journal article supplement (doi:10.1039/c7dt04094f), 2017-12-04
Supplement: c7dt04094f1.pdf [file c7dt04094f1.pdf]

## **Electronic Supporting Information**

### **Electron transport shuttle mechanism via Fe-N-C bond derived from conjugated microporous polymer for supercapacitor**

Alan Christian Lim, Harsharaj S. Jadhav and Jeong Gil Seo\*

*Department of Energy Science and Technology, Energy and Environment Fusion Technology*

*Center, Myongji University, Nam-dong, Cheoin-gu, Yongin-si 17058, Republic of Korea*

\*Corresponding author:

(E-mail: [jgseo@mju.ac.kr](mailto:jgseo@mju.ac.kr), Tel: +82-31-324-1338, Fax: +82-31-336-6336)

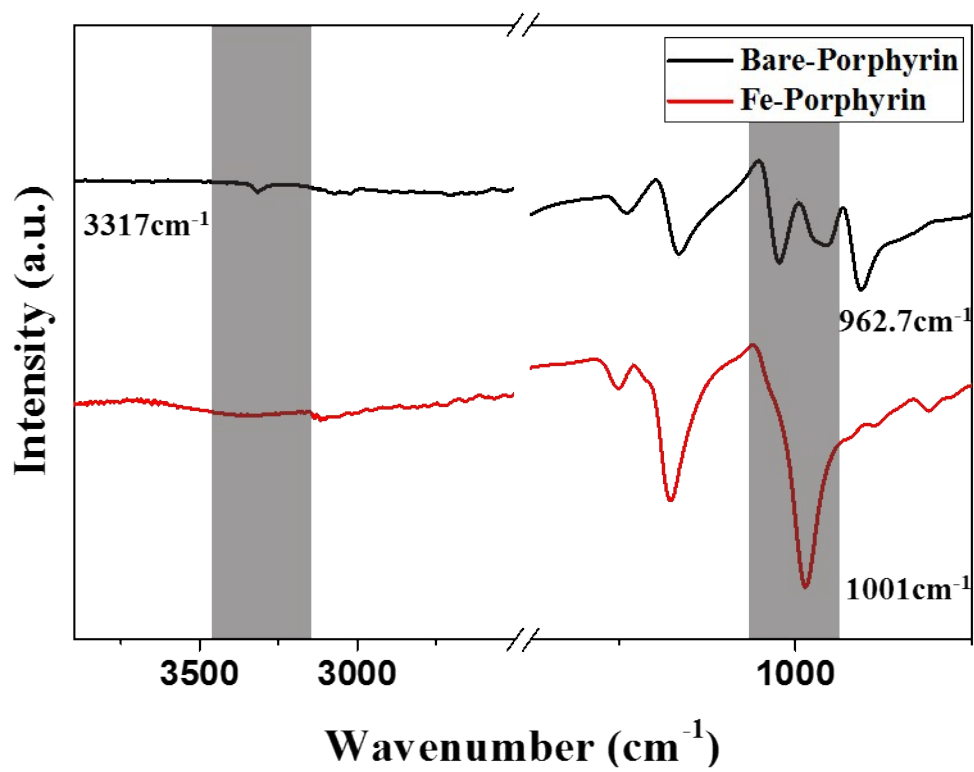

Fig. S1 FTIR spectra of the porphyrin monomers.

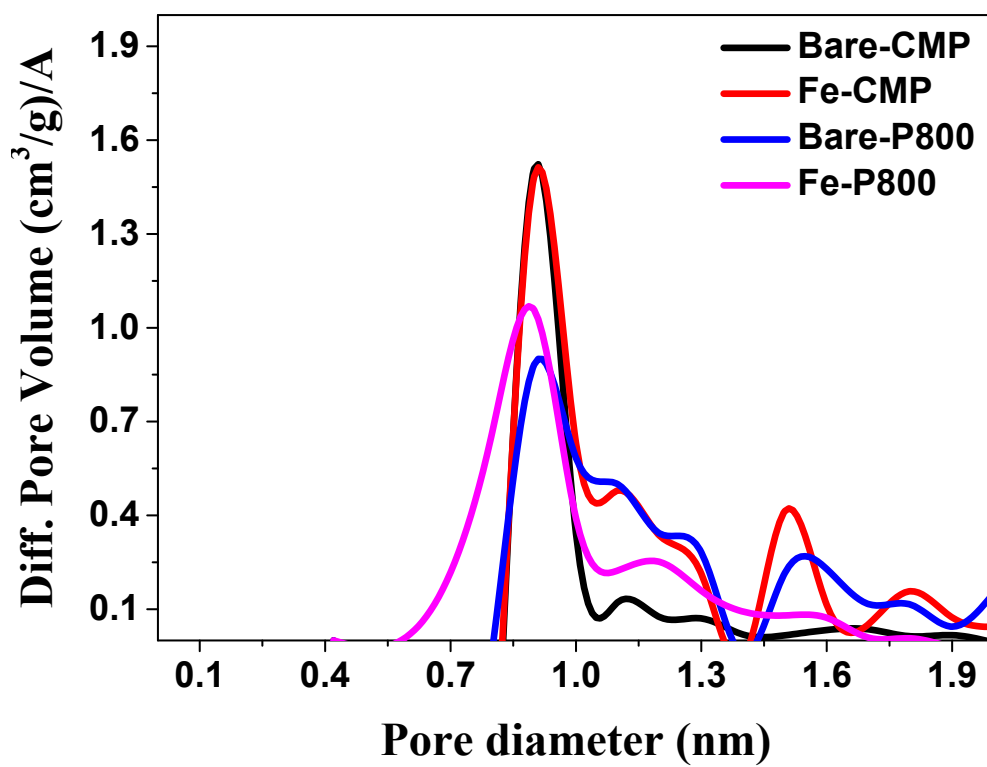

Fig. S2 Pore size distribution of electrode materials

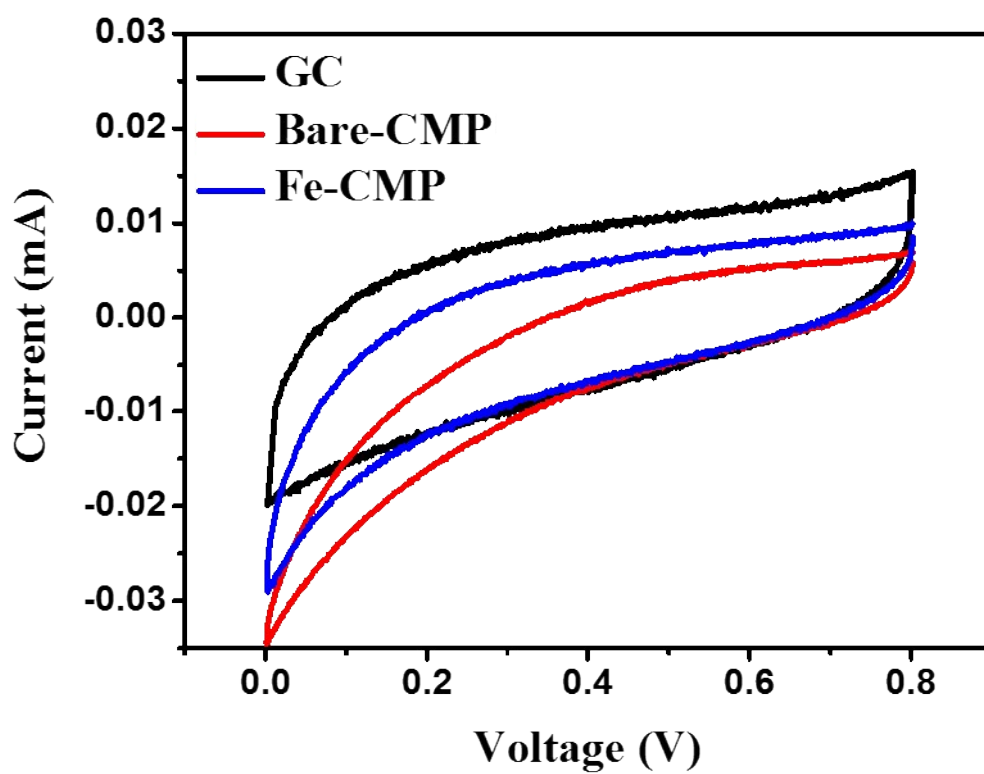

Fig. S3 CV graph of the CMPs at high scan rate (100 mV/s) in 1 M H<sub>2</sub>SO<sub>4</sub>.

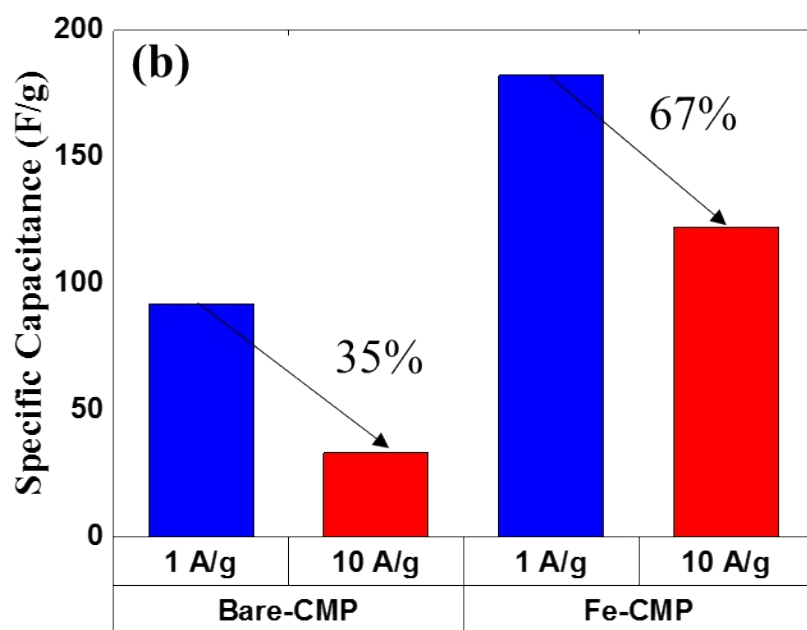

**Fig. S4** Calculated specific capacitance of P800 based on the discharge curves at different current densities.

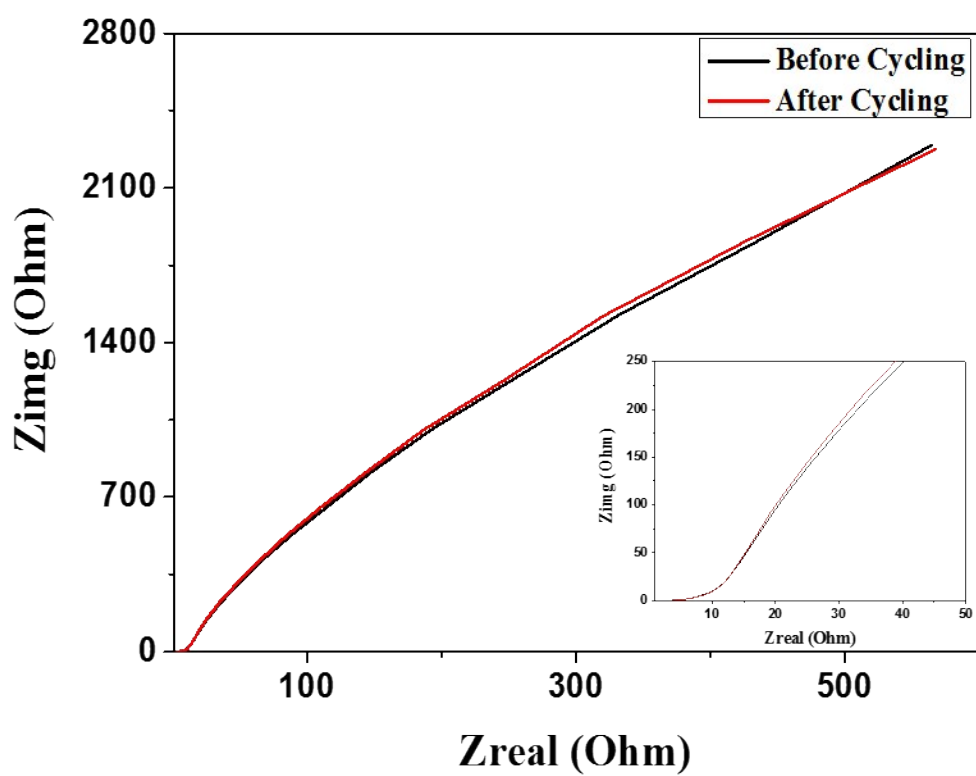

**Fig. S5** Nyquist plot of Fe-P800 electrode before and after 5000 cycles at high energy density (10 A/g).

|   | <b>Material</b>                                      | <b>Surface area<br/>(m<sup>2</sup>/g)</b> | <b>Specific<br/>capacitance (F/g)</b> | <b>Cycling test<br/>(Capacity retention )</b> | <b>Reference</b> |
|---|------------------------------------------------------|-------------------------------------------|---------------------------------------|-----------------------------------------------|------------------|
| 1 | Triazatruxene-based CMP<br>(-1.0V – 0.0V)            | 106                                       | 183 F/g @ 1A/g                        | 95%(10000 cycle) at 10 A/g                    | [1]              |
| 2 | PAF-Carbon<br>(0.0V – 1.0V)                          | 418                                       | 173 F/g @ 0.5A/g                      | 100% (9000 cycle) at 5 A/g                    | [2]              |
| 3 | Ni <sub>3</sub> (HITP) <sub>2</sub><br>(0.0V – 1.0V) | 630                                       | 102 F/g @ 0.1A/g                      | 90% (10000 cycle) at 2A/g                     | [3]              |
| 4 | CNT/N-doped carbon<br>(0.0V – 0.6V)                  | 200                                       | 100 F/g @ 0.5 A/g                     | N/A                                           | [4]              |
| 5 | Nitrogen-doped porous CNF<br>(-1.0V – 0.0V)          | 562                                       | 202 F/g @ 1A/g                        | 97% (3000 cycles) at 1A/g                     | [5]              |
| 6 | Nanofibrous Graphene-Templated CMP<br>(-1.0V – 0.0V) | 1234                                      | 179 F/g @ 0.2A/g                      | N/A                                           | [6]              |
| 7 | rGO film<br>(0.0V – 1.0V)                            | N/A                                       | 118 F/g @ 1A/g                        | >99% (1000 cycles) at 1A/g                    | [7]              |
| 8 | Graphene Oxide<br>(0.0V – 1.0V)                      | 617                                       | 189 F/g @ 0.1A/g                      | 93% (5000 cycles) at 0.4A/g                   | [8]              |
| 9 | Fe-N <sub>x</sub> /Carbon                            | 450                                       | 182 @ 1A/g                            | 100% (5000 cycle ) at 10 A/g                  | Present work     |

**Table-S1.** Comparison of current work from previous reported literatures



**Table-S2** Atomic composition obtained from XPS spectra

---

| <b>Material</b> | <b>C1s</b> | <b>O1s</b> | <b>N1s</b> | <b>Fe 2p1</b> | <b>Fe 2p3</b> |
|-----------------|------------|------------|------------|---------------|---------------|
| Bare-P800       | 79.7       | 18.3       | 2.04       | -             | -             |
| Fe-P800         | 83.0       | 13.9       | 1.93       | 0.6           | 0.59          |

---

## Reference

1. X.-C. Li, Y. Zhang, C.-Y. Wang, Y. Wan, W.-Y. Lai, H. Pang, and W. Huang, *Chem. Sci.*, 2017, **8**, 2959–2965.
2. Z. Xiang, D. Wang, Y. Xue, L. Dai, J.-F. Chen, and D. Cao, *Sci. Rep.*, 2015, **5**, 8307.
3. D. Sheberla, J. C. Bachman, J. S. Elias, C. J. Sun, Y. Shao-Horn, and M. Dincă, *Nat. Mater.*, 2017, **16**, 220-224.
4. F. Béguin, K. Szostak, G. Lota, and E. Frackowiak, *Adv. Mater.*, 2005, **17**, 2380-2384.
5. L. -F. Chen, X. -D. Zhang, H. -W. Liang, M. Kong, Q. -F. Guan, P. Chen, and Z. -Y. Wu and S. -H. Yu., *ACS Nano*, 2012, **8**, 7092-7102.
6. K. Yuan, P. Guo-Wang, T. Hu, L. Shi, R. Zeng, M. Forster, T. Pichler, Y. Chen, and U. Scherf, *Chem. Mater.*, 2015, **27**, 7403.7411.
7. B. G. Choi, J. Hong, W. H. Hong, P. T. Hammond, and H. Park, *ACS Nano*, 2011, **5**, 7205-7213.
8. B. Xu, S. Yue, Z. Sui, X. Zhang, S. Hou, G. Cao, and Y. Yang, *Energy Environ. Sci.*, 2011, **4**, 2826-2830.
